# Supplementary material for: Si@SiO2 nanowires/carbon textiles cable-type anodes for high-capacity reversible lithium-ion batteries
Source: Royal Society of Chemistry journal article supplement (doi:10.1039/c4ra01363h), 2014-01-01
Supplement: c4ra01363h1.pdf [file c4ra01363h1.pdf]

## Supporting Information

# Si@SiO<sub>2</sub> Nanowires/Carbon Textiles Cable-type Anodes for High-Capacity Reversible Lithium-Ion Batteries

Dongsheng Tan, Bin Liu, Di Chen,\* and Guozhen Shen\*

5

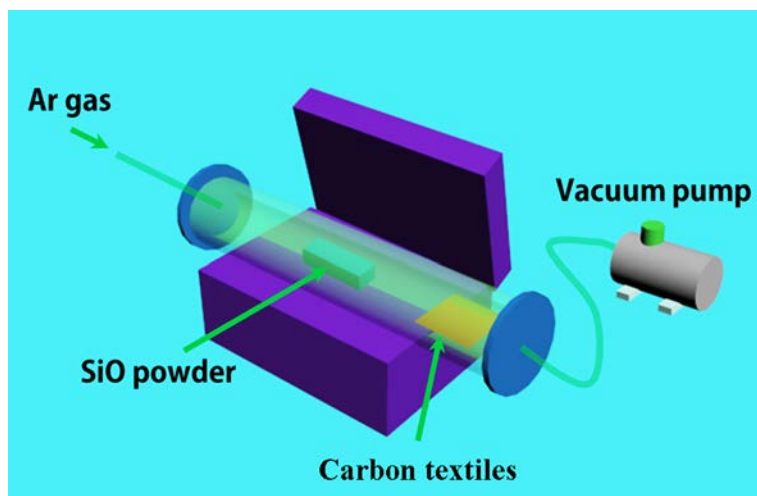

**Figure S1.** Schematic illustration of the experimental facility

10

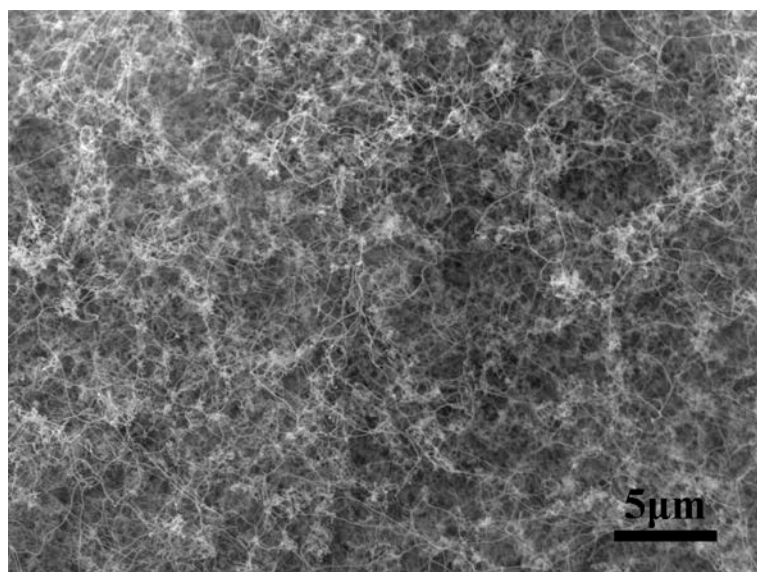

**Figure S2.** SEM image of Si@SiO<sub>2</sub> nanowires/carbon fiber.

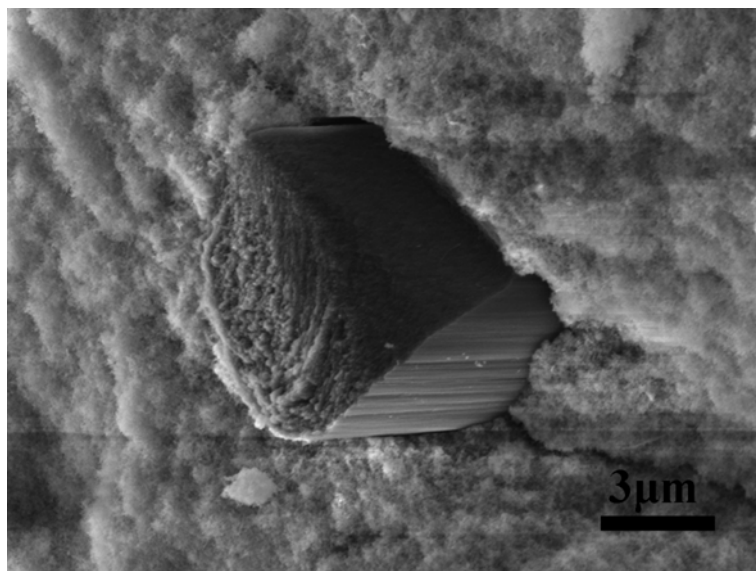

**Figure S3.** Cross section SEM image of Si@SiO<sub>2</sub> nanowires/carbon fiber.

5

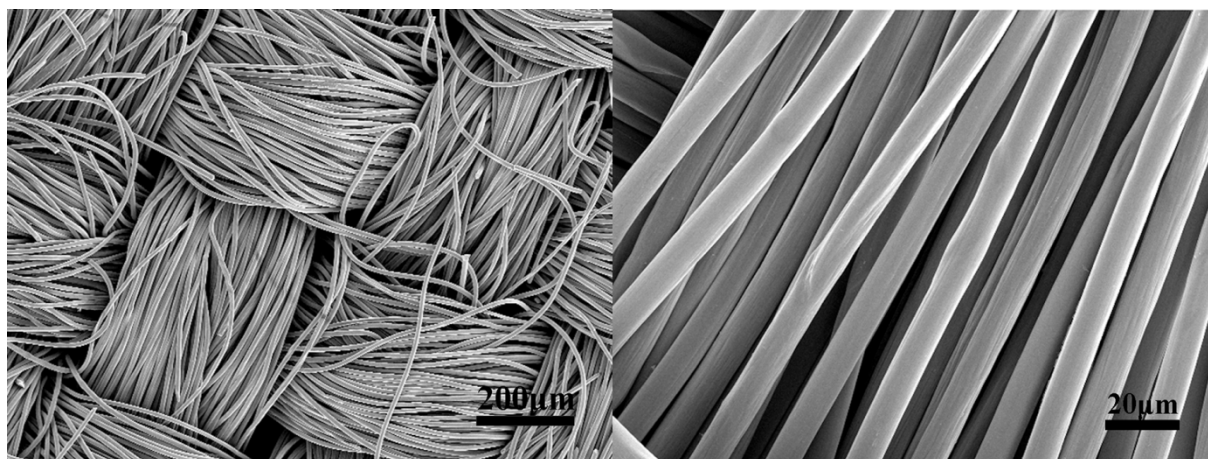

**Figure S4.** SEM of pure carbon textiles.

10

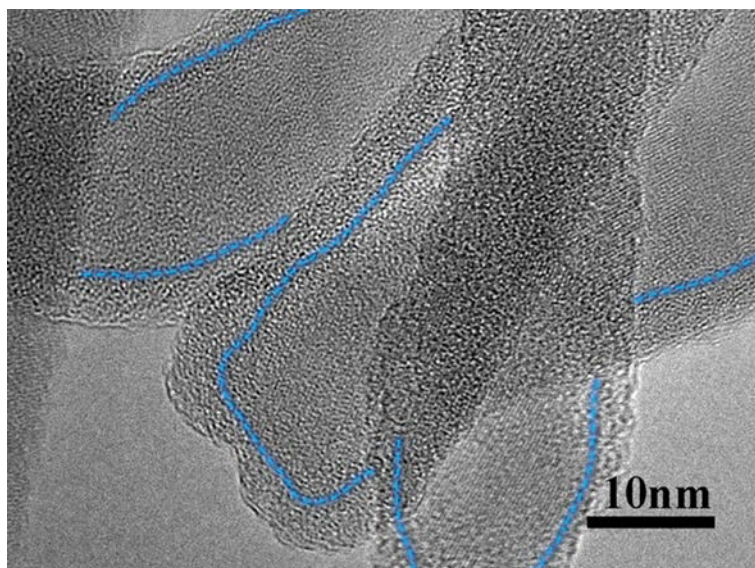

**Figure S5.** TEM of ultrafine core-shell Si@SiO<sub>2</sub> nanowires.

5

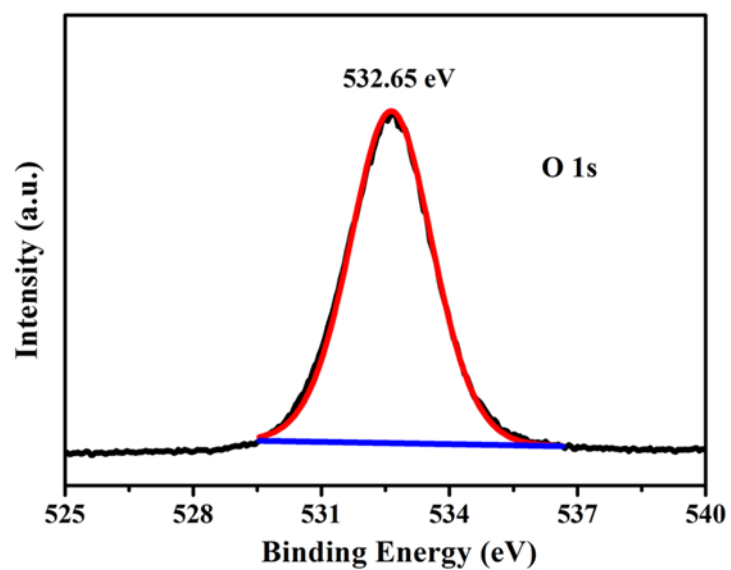

10

**Figure S6.** XPS spectrum of O 1s.

15

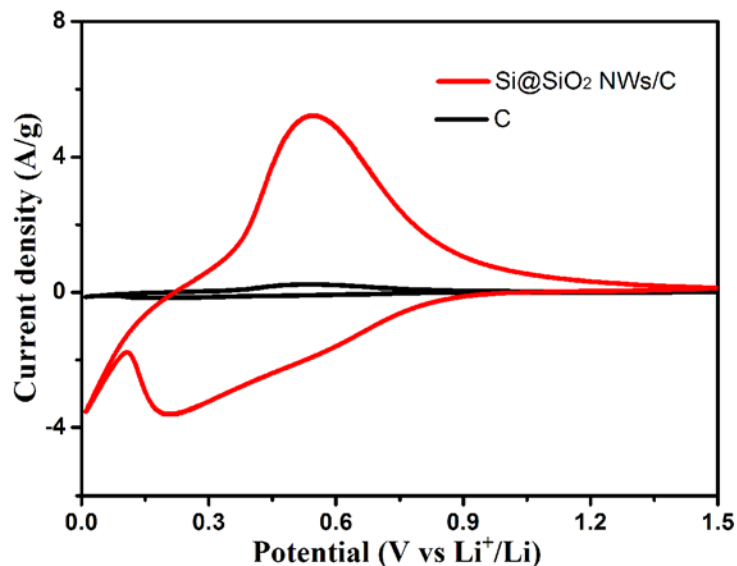

5 **Figure S7.** Cyclic voltammetry (CV) for the Si@SiO<sub>2</sub> NWs/C and pure C electrodes.

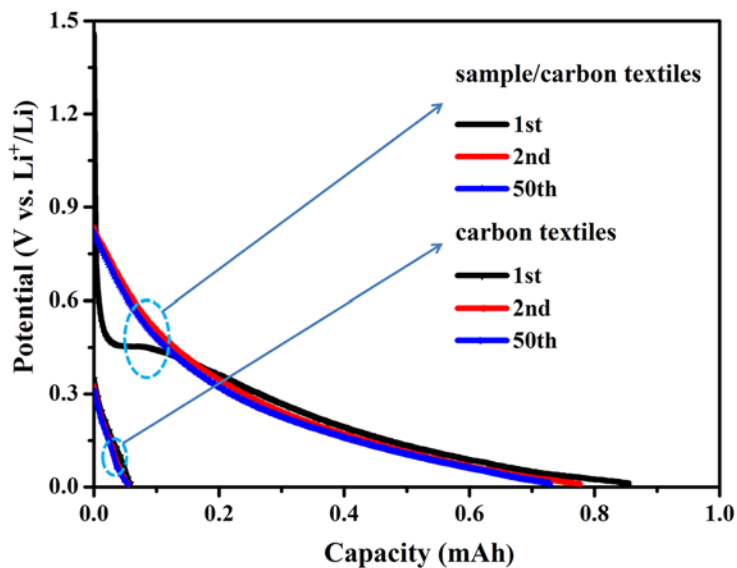

10 **Figure S8.** Galvanostatic discharge curves of samples/carbon fabric and carbon fabric.

15

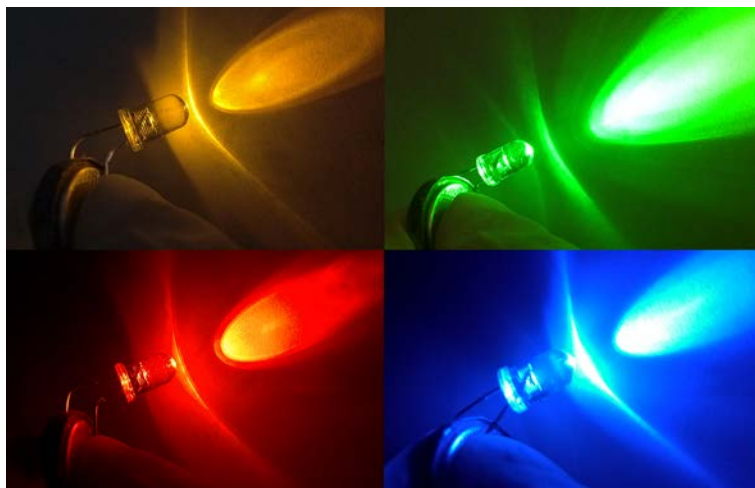

**Figure S9.** The practical application of the full cells, which can easily lighten LEDs with different colors.
